# Supplementary material for: Circulating exosomes from patients with peripheral artery disease influence vascular cell migration and contain distinct microRNA cargo
Source: PubMed Central journal article supplement — JVS Vasc Sci. 2020 Feb 28;1:28–41. doi: 10.1016/j.jvssci.2020.02.001 (PMC7299234; doi:10.1016/j.jvssci.2020.02.001), 2020-02-28
Supplement: NIHMS1593951-supplement-1.pdf [file NIHMS1593951-supplement-1.pdf]

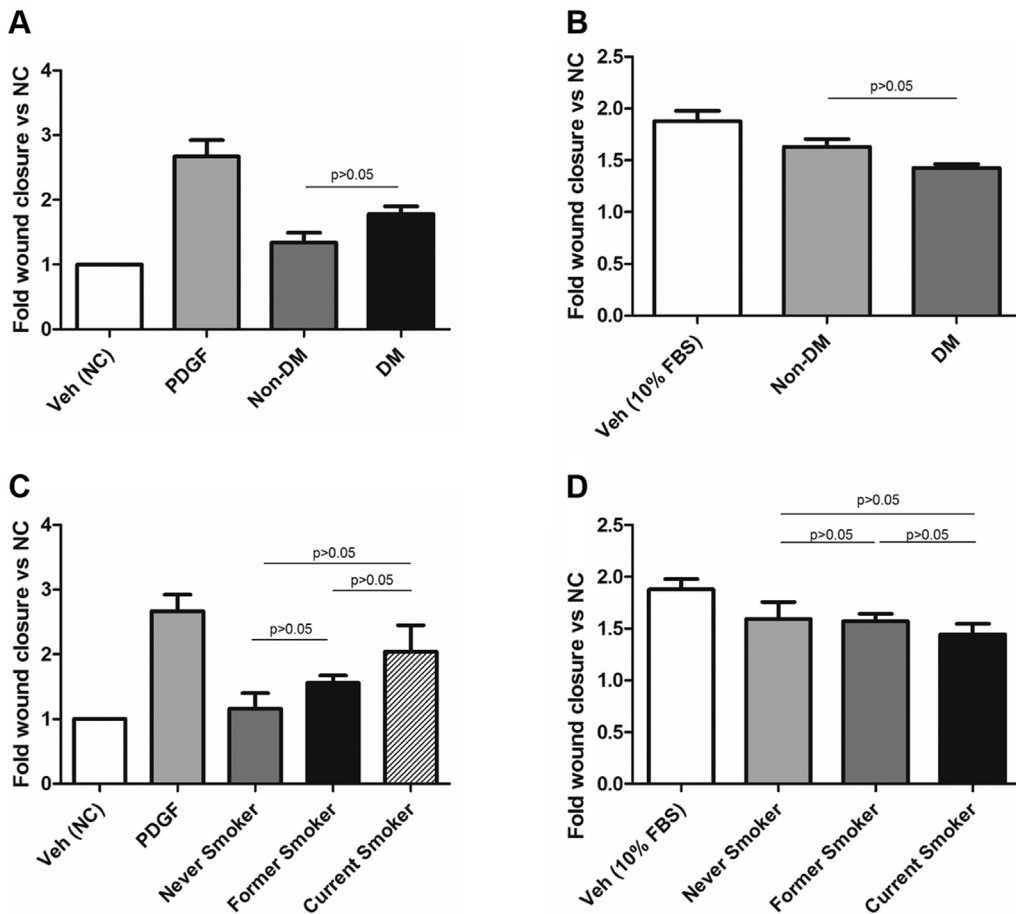

**Supplementary Fig 1.** Exosome-induced vascular smooth muscle cell (VSMC) and endothelial cell (EC) migration does not significantly differ by diabetic or smoking status. Fold change in VSMC (**A**) and EC (**B**) migration when treated with exosomes from nondiabetic (*non-DM*) vs diabetic (*DM*) patients did not differ significantly between the two groups. Fold change in VSMC (**C**) and EC (**D**) migration when treated with exosomes from nonsmokers vs former smokers vs current smokers also did not differ significantly between the two groups. *FBS*, Fetal bovine serum; *NC*, negative control; *PDGF*, platelet-derived growth factor; *Veh*, vehicle. Data are reported as mean  $\pm$  standard error of the mean.  $P > .05$  for all comparisons (one-way analysis of variance with Tukey post hoc test).

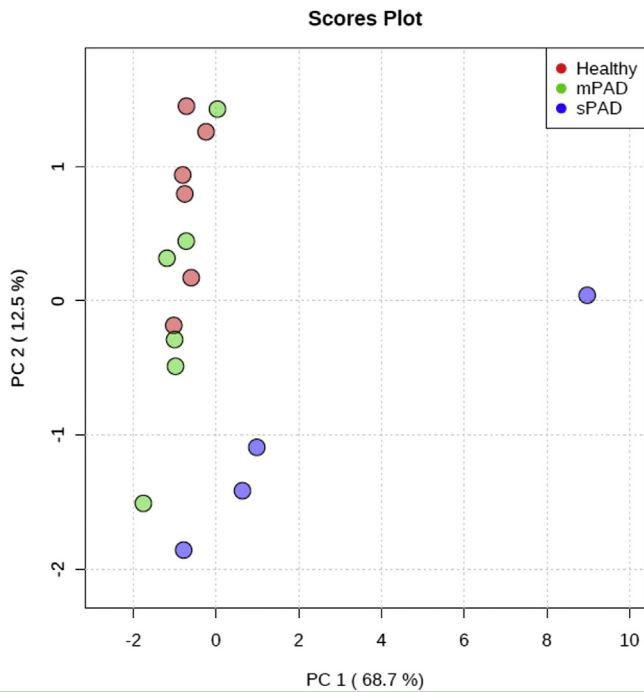

**Supplementary Fig 2.** Principal component (*PC*) analysis reveals distinct clusters of microRNA (miRNA) based on severity of peripheral artery disease (PAD). After normalization to a spike-in control, quantitative polymerase chain reaction (PCR) data from tested miRNA with cycle threshold values <35 were used to perform a principal component analysis, which reveals distinct clustering of patients with mild PAD (*mPAD*) and severe PAD (*sPAD*) based on their miRNA content.

**Supplementary Table.** Primer sequences for monocyte-derived macrophage (MDM) gene polymerase chain reaction (PCR) and exosome microRNA (*miRNA*) PCR

| Gene            | Primer sequence/assay ID (F = Forward, R = Reverse)       |
|-----------------|-----------------------------------------------------------|
| TNF $\alpha$    | F: AGAGGGCCTGTACCTCATCTACTC<br>R: GTTGACCTTGGTCTGGTAGGA   |
| MCPI            | F: CAGCAGCAAGTGTCCCAAAG<br>R: GAATCCTGAACCCACTTCTGCTT     |
| CXCL10          | ID: Hs.58.39328322.gs (IDT Technologies)                  |
| IL10            | F: GGCGCTGTCATCGATTTCCT<br>R: GTAGATGCCTTCTCTTGGAGCTT     |
| CCL17           | ID: Hs.PT.58.159549 (IDT Technologies)                    |
| MRC1            | ID: Hs.PT.58.15093573 (IDT Technologies)                  |
| UBC             | F: ATTTGGTTCGCGGTTCTTG<br>R: TGCCTTGACATTCTCGATGGT        |
| HPRT            | F: CAAGCTTGCTGGTGAAGGGA<br>R: TGAAGTACTTATAGTCAAGGGCATATC |
| miRNA           | Primer sequence/catalog No. (Qiagen)                      |
| hsa-miR-21-5p   | Sequence: 5'UAGCUUAUCAGACUGAUGUUGA<br>Cat #: YP00204230   |
| hsa-miR-23b-3p  | Sequence: 5'AUCACAUUGCCAGGGAUUACC<br>Cat #: YP00204790    |
| hsa-miR-122-5p  | Sequence: 5'UGGAGUGUGACAAUGGUGUUUG<br>Cat #: YP00205664   |
| hsa-miR-126-3p  | Sequence: 5'UCGUACCGUGAGUAAUUAUGCG<br>Cat #: YP00204227   |
| hsa-miR-143-3p  | Sequence: 5'UGAGAUGAAGCACUGUAGCUC<br>Cat #: YP00205992    |
| hsa-miR-145-5p  | Sequence: 5'GUCCAGUUUCCCAGGAUCCCU<br>Cat #: YP00204483    |
| hsa-miR-146a-5p | Sequence: 5'UGAGAACUGAAUCCAUGGGUU<br>Cat #: YP00204688    |
| hsa-miR-146b-5p | Sequence: 5'UGAGAACUGAAUCCAUGGGUU<br>Cat #: YP00204553    |
| hsa-miR-155-5p  | Sequence: 5'UUAUUGCUAAUCGUGAUAGGGGU<br>Cat #: YP00204308  |
| hsa-miR-181b-5p | Sequence: 5'AACAUUCAUUGCUGUCGGUGGGU<br>Cat #: YP00204530  |
| hsa-miR-195-5p  | Sequence: 5'UAGCAGCACAGAAUUAUUGCC<br>Cat #: YP00205869    |
| hsa-miR-208a-3p | Sequence: 5'AUAAGACGAGCAAAAAGCUUGU<br>Cat #: YP00205619   |
| hsa-miR-219-5p  | Sequence: 5'UGAUUGUCCAAACGCAAUUCU<br>Cat #: YP00204780    |
| hsa-miR-221-3p  | Sequence: 5'AGCUACAUUGUCUGCUGGGUUUC<br>Cat #: YP00204532  |
| hsa-miR-222-3p  | Sequence: 5'AGCUACAUCUGGCUACUGGGU<br>Cat #: YP00204551    |
| hsa-miR-1202    | Sequence: 5'GUGCCAGCUGCAGUGGGGGAG<br>Cat #: YP00206001    |
